# Supplementary material
Source: PubMed Central journal article supplement (PMC3190765)

## Supplemental Data

Supplemental Figure 1. Titration of MBNL1 in the presence of T1 RNase. A titration of MBNL1 (0.3 M to 10 uM) showed a gradual increase in protection as protein concentration was increased.

Supplemental Figure 2. Gel shifts of MBNL1 with deletions in the MBNL1 90 nucleotide response element. The left gel shift is of Del 4  $\Delta$ 18, the center gel is of Del 5  $\Delta$ 19 and the right gel shift is of Del 5 $\Delta$ 19 with all YGCY motifs mutated to YACY. Concentrations of the protein increase from left to right: 0 nM, 0.026 nM, 0.2 nM, 0.9 nM, 6 nM, 30 nM, 200 nM and 1200 nM.

Supplemental Figure 1

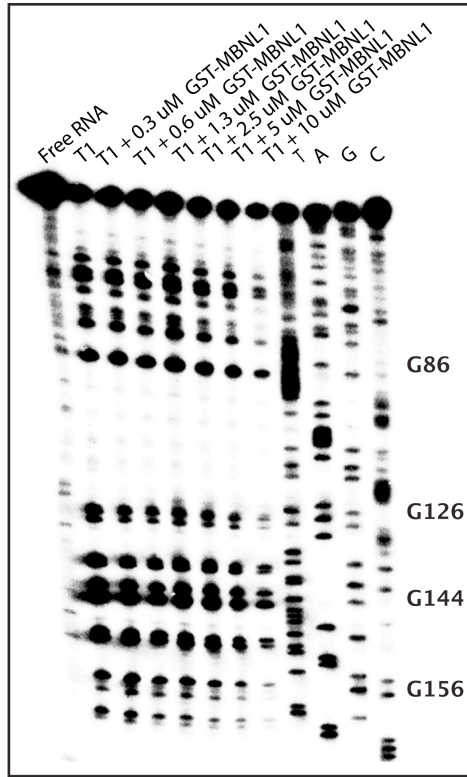

Supplemental Figure 2

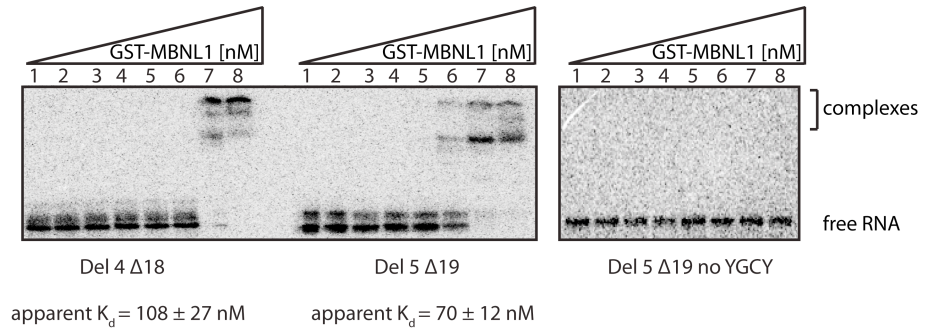

Supplement: supp_M111.236547_jbc.M111.236547-1.pdf [file supp_M111.236547_jbc.M111.236547-1.pdf]
